# Supplementary material for: Microwave Optimized Synthesis of N-(adamantan-1-yl)-4-[(adamantan-1-yl)-sulfamoyl]benzamide and Its Derivatives for Anti-Dengue Virus Activity
Source: PubMed Central journal article supplement (PMC6099921; doi:10.3390/molecules23071678), 2018-07-10
Supplement: molecules-23-01678-s001.pdf [file molecules-23-01678-s001.pdf]

# Synthesis and evaluation of *N*-(adamantan-1-yl)-4-[(adamantan-1-yl)-sulfamoyl]benzamide and its derivatives as anti-dengue virus agents

Jacques Joubert <sup>1,\*</sup>, Eugene B. Foxen <sup>1</sup> and Sarel F. Malan <sup>1</sup>

<sup>1</sup> *Pharmaceutical Chemistry, School of Pharmacy, University of the Western Cape, Private Bag X17, Bellville, South Africa; jjoubert@uwc.ac.za; efoxen@uwc.ac.za; sfmalan@uwc.ac.za*

\* Correspondence: jjoubert@uwc.ac.za; Tel.: +27-21-959-2195

## Supplementary information

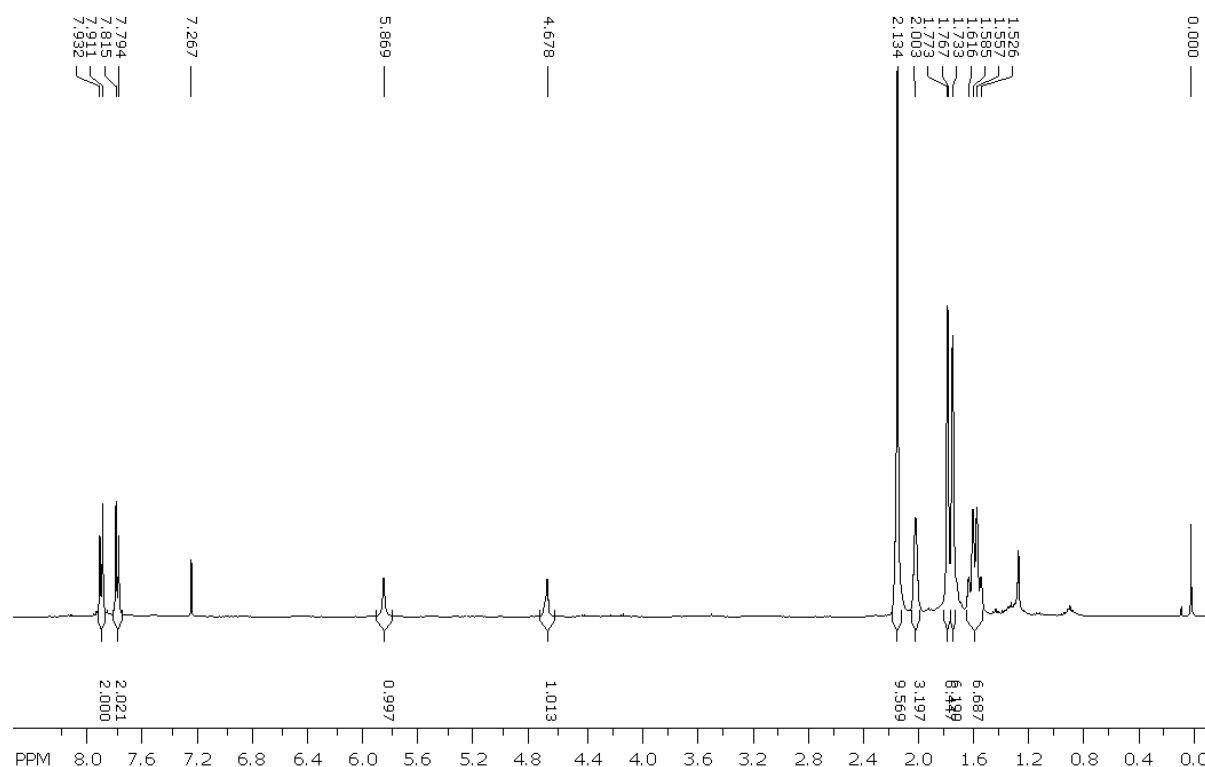

Supplementary Figure 1. <sup>1</sup>H-NMR of 3.

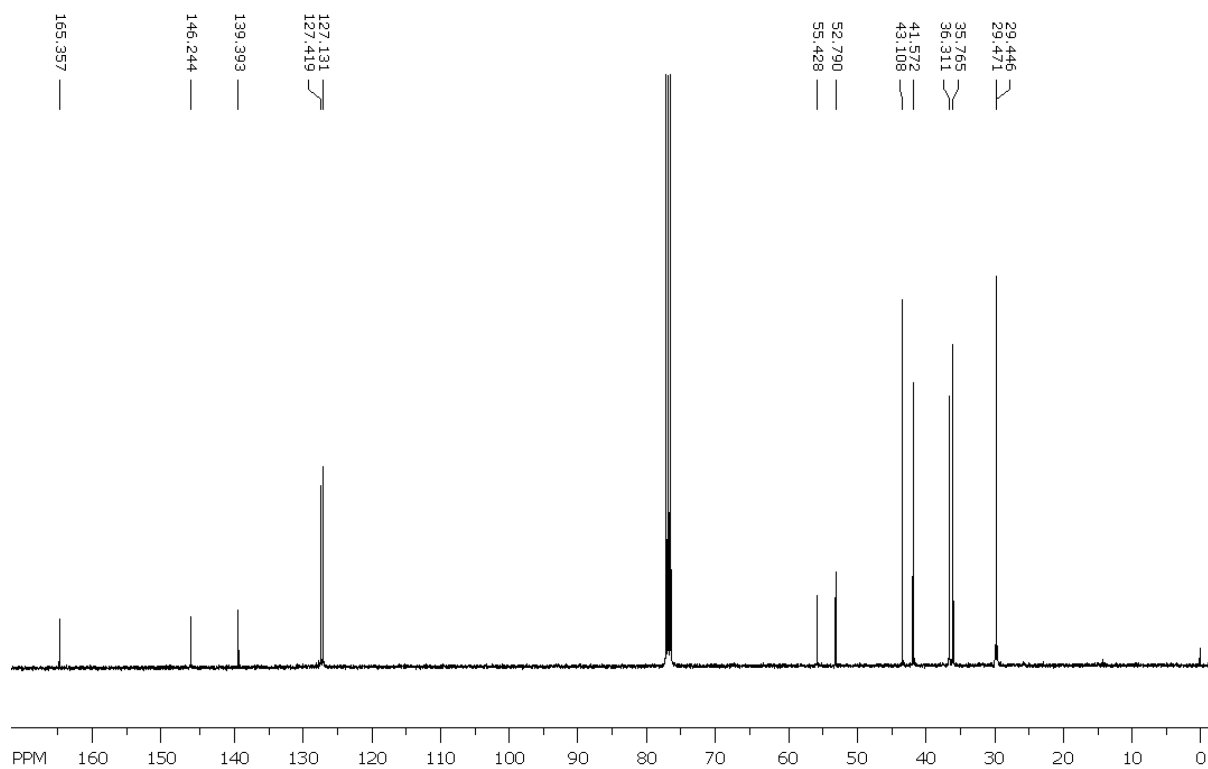

Supplementary Figure 2. <sup>13</sup>C-NMR of 3.

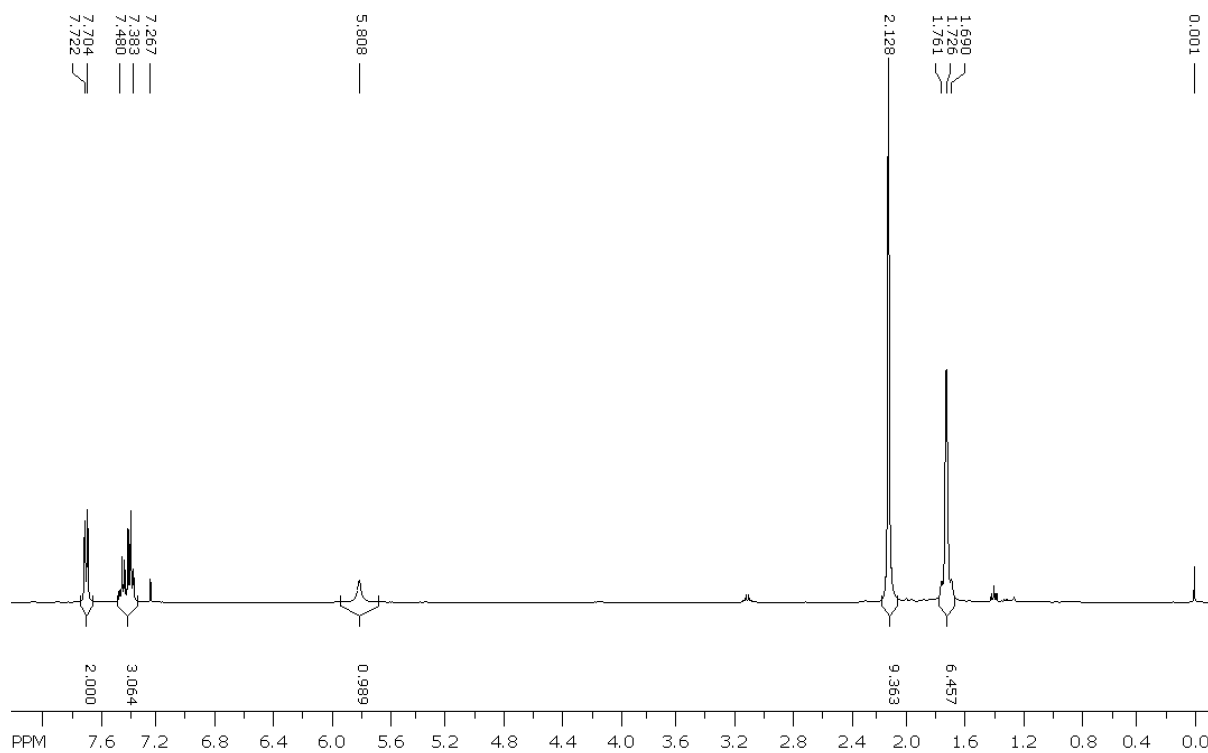

Supplementary Figure 3. <sup>1</sup>H-NMR of 6.

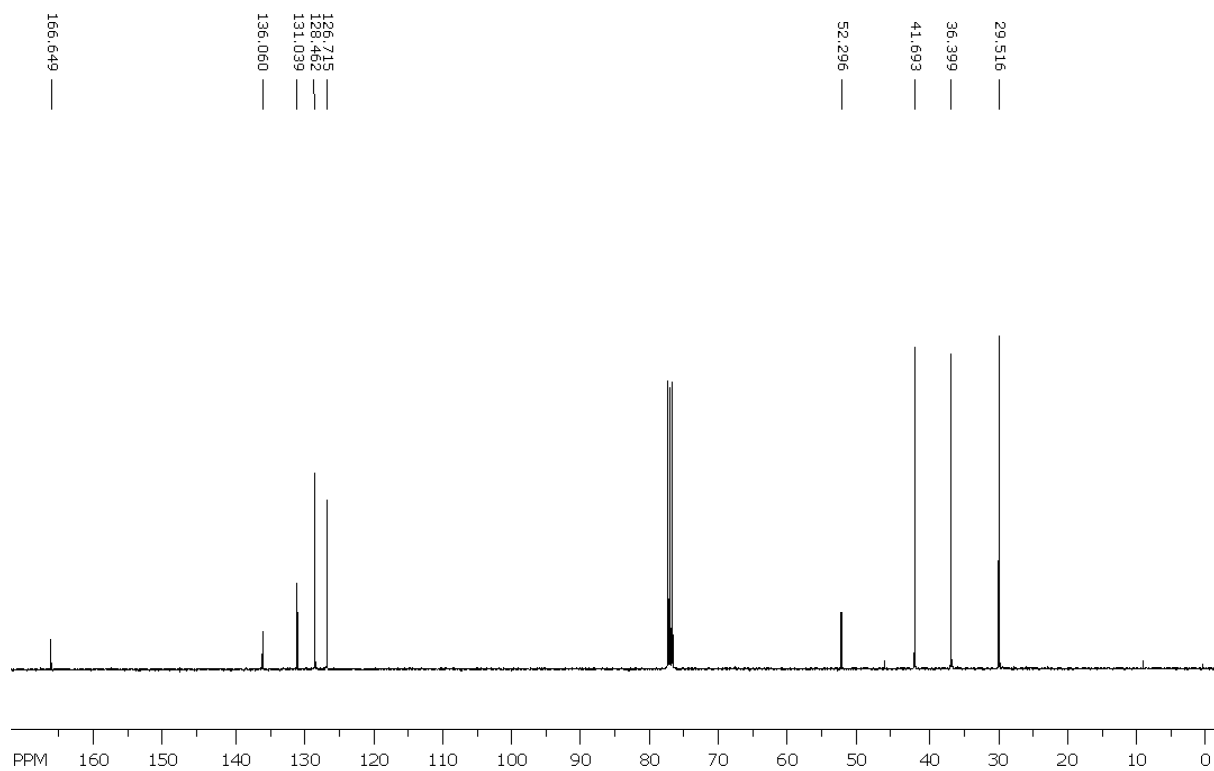

Supplementary Figure 4.  $^{13}\text{C}$ -NMR of 6.

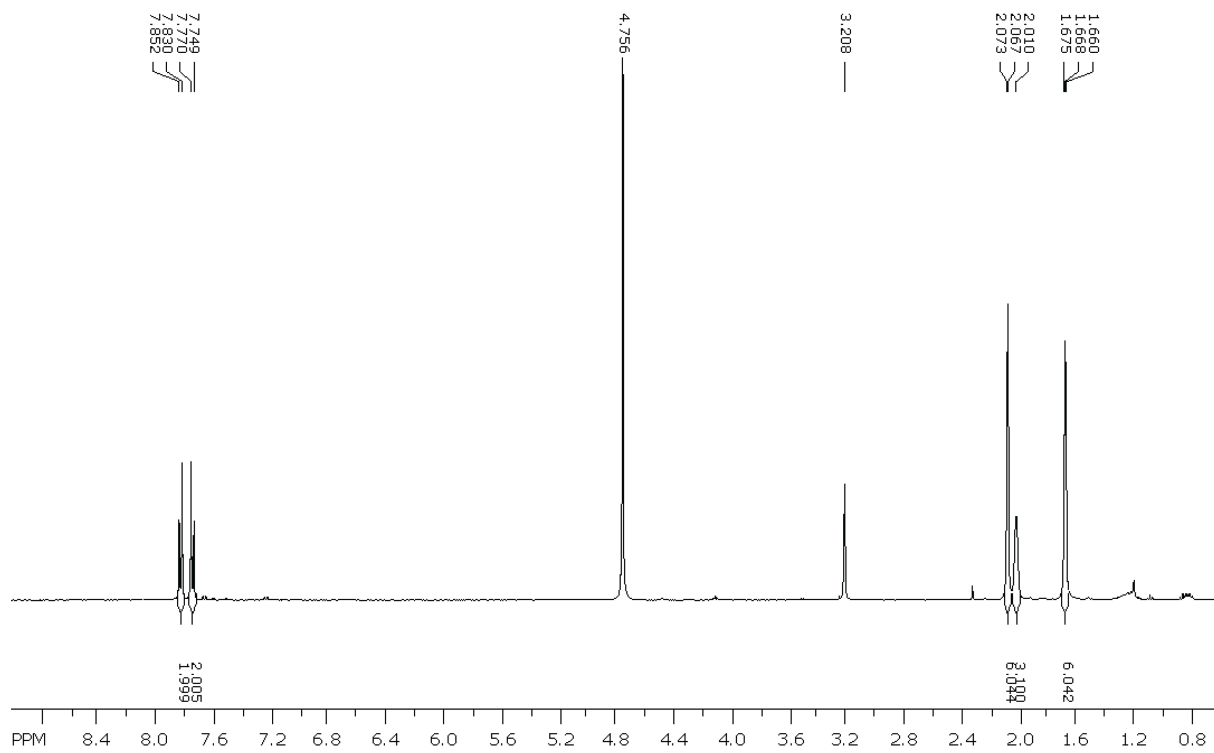

Supplementary Figure 5.  $^1\text{H}$ -NMR of 7.

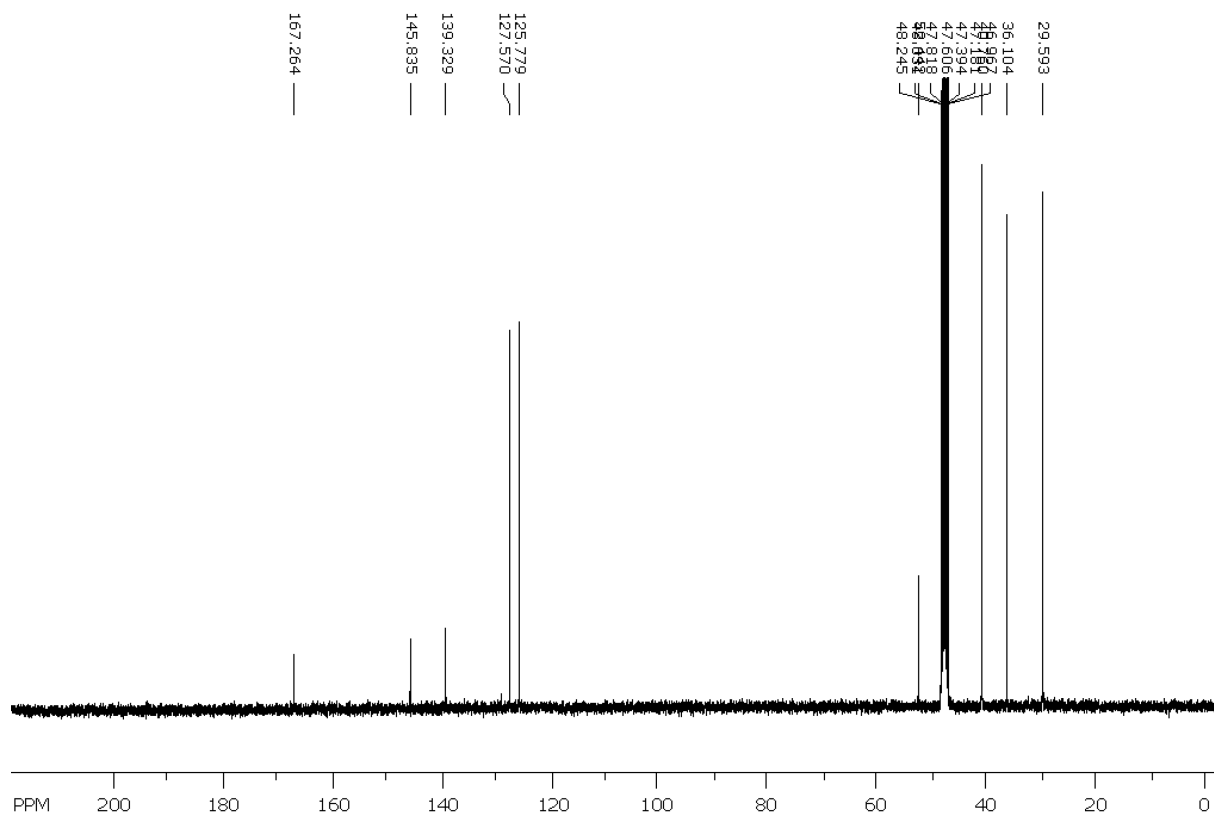

Supplementary Figure 6. <sup>13</sup>C-NMR of 7.
